# Supplementary material for: Carbon footprint of healthcare systems: a systematic review of evidence and methods
Source: HighWire-hosted journal article supplement (doi:10.1136/bmjopen-2023-078464), 2024-04-01
Supplement: bmjopen-2023-078464supp006_data_supplement.pdf [file bmjopen-2023-078464supp006_data_supplement.pdf]

Appendix: Transparency Score

Please use Ctrl + Scroll to zoom in this electronic appendix

| Author          | Year | Author (Year)          | Title                                                                                                                                         | Health Care System           | Total Carbon Footprint | tCO2/capita | % of total emission | Breakdown | Method | Demand Data source | Demand Data year | Number of demand/ Expenditure categories | I-O table data source | I-O table data year | Multiregionality of the model | Number of production sectors | Source of emission data/ satellite account | Included Greenhouse Gases | Concordance matrix reported | Sensitivity /Uncertainty Analysis | Discussion of limitations |      |        |
|-----------------|------|------------------------|-----------------------------------------------------------------------------------------------------------------------------------------------|------------------------------|------------------------|-------------|---------------------|-----------|--------|--------------------|------------------|------------------------------------------|-----------------------|---------------------|-------------------------------|------------------------------|--------------------------------------------|---------------------------|-----------------------------|-----------------------------------|---------------------------|------|--------|
| Nansai et al.   | 2020 | Nansai et al. (2020)   | Carbon footprint of Japanese health care services from 2011 to 2015                                                                           | Japan                        | 1                      | 0           | 1                   | 1         | 1      | 1                  | 1                | 1                                        | 1                     | 1                   | 1                             | 1                            | 1                                          | 1                         | 0                           | 0                                 | 1                         | 14   | 82,35% |
| Eckelman et al. | 2016 | Eckelman et al. (2016) | Environmental Impacts of the U.S. Health Care System and Effects on Public Health                                                             | USA                          | 1                      | 0           | 1                   | 1         | 1      | 1                  | 1                | 1                                        | 1                     | 1                   | 1                             | 1                            | 1                                          | 0,5                       | 1                           | 0                                 | 1                         | 14,5 | 85,29% |
| Pichler et al.  | 2019 | Pichler et al. (2019)  | International comparison of health care carbon footprints                                                                                     | OECD countries; China; India | 1                      | 1           | 1                   | 1         | 1      | 1                  | 1                | 1                                        | 1                     | 1                   | 1                             | 1                            | 1                                          | 1                         | 1                           | 0                                 | 1                         | 16   | 94,12% |
| Eckelman et al. | 2018 | Eckelman et al. (2018) | Life cycle environmental emissions and health damages from the Canadian healthcare system: An economic-environmental-epidemiological analysis | Canada                       | 1                      | 1           | 1                   | 1         | 1      | 1                  | 1                | 1                                        | 1                     | 1                   | 1                             | 1                            | 1                                          | 1                         | 1                           | 0                                 | 1                         | 16   | 94,12% |
| Malik et al.    | 2018 | Malik et al. (2018)    | The carbon footprint of Australian health care                                                                                                | Australia                    | 1                      | 0           | 1                   | 1         | 1      | 1                  | 1                | 1                                        | 1                     | 1                   | 1                             | 1                            | 1                                          | 0,5                       | 0                           | 1                                 | 1                         | 14,5 | 85,29% |
| Wu              | 2019 | Wu (2019)              | The carbon footprint of the Chinese health-care system: an environmentally extended input-output and structural path analysis study           | China                        | 1                      | 1           | 1                   | 1         | 1      | 1                  | 1                | 1                                        | 1                     | 1                   | 1                             | 1                            | 1                                          | 1                         | 0                           | 1                                 | 1                         | 16   | 94,12% |
| NHSScotland     | 2008 | NHSScotland (2008)     | National Health Service Scotland Carbon Footprint of NHS Scotland(1990-2004)                                                                  | Scotland                     | 1                      | 0           | 1                   | 1         | 1      | 1                  | 1                | 1                                        | 1                     | 1                   | 1                             | 1                            | 1                                          | 1                         | 0                           | 0                                 | 0                         | 13   | 76,47% |
| SDU series      | 2016 | SDU series (2016)      | Carbon update for the health and care sector in England 2015                                                                                  | NHS England                  | 1                      | 0           | 0                   | 1         | 1      | 1                  | 1                | 1                                        | 1                     | 1                   | 1                             | 1                            | 1                                          | 1                         | 0                           | 0                                 | 0                         | 12   | 70,59% |
| HCH             | 2019 | HCH (2019)             | Health Care's Climate Footprint                                                                                                               | 43 countries                 | 1                      | 1           | 1                   | 1         | 1      | 1                  | 1                | 0                                        | 1                     | 1                   | 1                             | 1                            | 1                                          | 1                         | 1                           | 0                                 | 1                         | 15   | 88,24% |

|                    |      |                           |                                                                                               |                            |         |        |        |        |         |         |         |        |         |         |         |         |        |        |        |        |        |        |        |
|--------------------|------|---------------------------|-----------------------------------------------------------------------------------------------|----------------------------|---------|--------|--------|--------|---------|---------|---------|--------|---------|---------|---------|---------|--------|--------|--------|--------|--------|--------|--------|
| Weisz et al.       | 2020 | Weisz et al. (2020)       | Carbon emission trends and sustainability options in Austrian health care                     | Austria                    | 1       | 1      | 1      | 1      | 1       | 1       | 1       | 1      | 1       | 1       | 1       | 1       | 1      | 1      | 0      | 1      | 16     | 94,12% |        |
| Malik et al.       | 2021 | Malik et al. (2021)       | Environmental impacts of Australia's largest health system                                    | New South Wales, Australia | 1       | 0      | 1      | 0      | 1       | 1       | 1       | 1      | 1       | 1       | 1       | 1       | 0      | 0      | 1      | 0      | 1      | 12     | 70,59% |
| Eckelman et al.    | 2020 | Eckelman et al. (2020)    | Health Care Pollution And Public Health Damage In The United States: An Update                | USA                        | 1       | 0      | 0      | 1      | 1       | 1       | 1       | 1      | 1       | 1       | 1       | 1       | 0      | 1      | 0      | 1      | 13     | 76,47% |        |
| Tennison et al.    | 2021 | Tennison et al. (2021)    | Health care's response to climate change: a carbon footprint assessment of the NHS in England | England                    | 1       | 1      | 0      | 1      | 1       | 1       | 1       | 1      | 1       | 1       | 1       | 1       | 1      | 1      | 0      | 1      | 15     | 88,24% |        |
| Lenzen et al.      | 2020 | Lenzen et al. (2020)      | The environmental footprint of health care: a global assessment                               | 189 countries              | 1       | 1      | 1      | 0      | 1       | 1       | 1       | 1      | 1       | 1       | 1       | 1       | 1      | 0      | 1      | 1      | 15     | 88,24% |        |
| Steenmeijer et al. | 2022 | Steenmeijer et al. (2022) |                                                                                               | Netherlands                | 1       | 0      | 1      | 1      | 1       | 1       | 1       | 1      | 1       | 1       | 1       | 1       | 1      | 1      | 0      | 1      | 15     | 88,24% |        |
|                    |      |                           |                                                                                               |                            | 15      | 7      | 12     | 13     | 15      | 15      | 15      | 14     | 15      | 15      | 15      | 15      | 11     | 12     | 11     | 3      | 13     |        |        |
|                    |      |                           |                                                                                               |                            | 100,00% | 46,67% | 80,00% | 86,67% | 100,00% | 100,00% | 100,00% | 93,33% | 100,00% | 100,00% | 100,00% | 100,00% | 73,33% | 80,00% | 73,33% | 20,00% | 86,67% |        |        |
